# Supplementary material for: Prescribing Patterns and Outcomes of Edoxaban in Atrial Fibrillation: One-Year Data from the Global ETNA-AF Program
Source: MDPI journal article supplement (doi:10.3390/jcm12051870), 2023-02-27
Supplement: s1 [file s1]

## SUPPLEMENTARY DATA

**Table S1. Percentage of patients receiving edoxaban 60 and 30 mg doses according to local labels**

|                                   | <b>Edoxaban Total<br/>(N=26,823)</b> |          | <b>Edoxaban 60 mg<br/>(n=14,348)</b> |          | <b>Edoxaban 30 mg<br/>(n=12,475)</b> |          |
|-----------------------------------|--------------------------------------|----------|--------------------------------------|----------|--------------------------------------|----------|
|                                   | <b>n</b>                             | <b>%</b> | <b>n</b>                             | <b>%</b> | <b>n</b>                             | <b>%</b> |
| Body weight ≤60 kg                |                                      |          |                                      |          |                                      |          |
| Europe                            | 1310                                 | 10.3     | 488                                  | 5.1      | 822                                  | 27.2     |
| South Korea/Taiwan                | 846                                  | 34.0     | 202                                  | 16.9     | 644                                  | 50.0     |
| Japan                             | 6000                                 | 55.2     | 168                                  | 5.6      | 5832                                 | 74.2     |
| Global                            | 8156                                 | 31.3     | 858                                  | 6.2      | 7298                                 | 60.0     |
| Creatinine clearance 15–50 mL/min |                                      |          |                                      |          |                                      |          |
| Europe                            | 2391                                 | 21.0     | 708                                  | 8.3      | 1683                                 | 59.8     |
| South Korea/Taiwan                | 704                                  | 29.7     | 133                                  | 11.8     | 571                                  | 46.2     |
| Japan                             | 3439                                 | 31.9     | 69                                   | 2.3      | 3370                                 | 43.3     |
| Global                            | 6534                                 | 26.7     | 910                                  | 7.2      | 5624                                 | 47.5     |
